# Supplementary material for: Copper nanoclusters on specific-primer PCR fragments with magnetic capture for the label-free fluorescent sensing of the T315I single nucleotide variant in the BCR–ABL1 gene
Source: Royal Society of Chemistry journal article supplement (doi:10.1039/d2an01433e), 2022-01-01
Supplement: d2an01433e1.pdf [file d2an01433e1.pdf]

## Supplemental Data

### The copper nanoclusters on the specific-primer PCR fragments with magnetic capture for label-free fluorescent sensing the T315I single nucleotide variant in BCR-ABL1 gene

Ke-Peng Lai<sup>a, †</sup>, Yu-Chen Su<sup>a, †</sup>, Bo-Siang Fu<sup>b</sup>, Kung-Hung Lin<sup>c</sup>, Hwang-Shang Kou<sup>a</sup>, Chun-Chi Wang<sup>a,d,e\*</sup>

<sup>a</sup> School of Pharmacy, College of Pharmacy, Kaohsiung Medical University, Kaohsiung, Taiwan, ROC.

<sup>b</sup> Division of Orthopedic Surgery, Department of Surgery, Zuoying Branch of Kaohsiung Armed Forces General Hospital, Kaohsiung, Taiwan, ROC.

<sup>c</sup> Department of Surgery, Division of General Surgery, Zuoying Branch of Kaohsiung Armed Forces General Hospital, Kaohsiung, Taiwan, ROC.

<sup>d</sup> Department of Medical Research, Kaohsiung Medical University Hospital, Kaohsiung, Taiwan, ROC.

<sup>e</sup> Drug Development and Value Creation Research Center, Kaohsiung Medical University, Kaohsiung, Taiwan, ROC.

<sup>†</sup>These authors contributed equally to this work.

#### Corresponding authors:

**Chun-Chi Wang**, Ph.D.

School of Pharmacy, College of Pharmacy, Kaohsiung Medical University  
100, Shi-Chuan 1st Rd., Kaohsiung 807, Taiwan

Fax: 886-7-3210683

Tel: 886-7-3121101 ext 2253

E-mail: chunchi0716@kmu.edu.tw

Table S1. The sequence of designed primers and the templates of T315I mutation site.

| Primer's name                   | Sequence (5'→3')                                                                                                                                                                                                 |
|---------------------------------|------------------------------------------------------------------------------------------------------------------------------------------------------------------------------------------------------------------|
| <i>BCR-ABL1-F</i> <sub>22</sub> | CGTGA TGAAC GTATG AGCGT ATGGG AGCCC CCGTT CTATA TCA                                                                                                                                                              |
| <i>BCR-ABL1-F</i> <sub>23</sub> | TTACC TTCCT CCGCA AACT GCA GG GAGCC CCCGT TCTAT ATCA                                                                                                                                                             |
| <i>BCR-ABL1-F</i> <sub>24</sub> | TACTC GCTCA TACGT TCATT GTACG GGAGC CCCC G TTCTA<br>TATCA                                                                                                                                                        |
| <i>BCR-ABL1-F</i> <sub>32</sub> | TACTC ATACG CTCAT ACGTT CATCA CGACT ACGGG AGCCC<br>CCGTT CTATA TCA                                                                                                                                               |
| <i>BCR-ABL1-R</i>               | biotin-CGAGA TCTGA GTGGC CATGT A                                                                                                                                                                                 |
| Template's name                 | Sequence (5'→3')                                                                                                                                                                                                 |
| Exon 6-Wild                     | G GGTCTGCACC CGGGAGCCCC CGTTCTATAT CATCACTGAG<br>TTCATGACCT ACGGGAACCT CCTGGACTAC CTGAGGGAGT<br>GCAACCGGCA GGAGGTGAAC GCCGTGGTGC TGCTGTACAT<br>GGCCACTCAG ATCTCGTCAG CCATGGAGTA CCTGGAGAAG<br>AAAAACTTCA TCCACAG |
| Exon 6-Mutant                   | G GGTCTGCACC CGGGAGCCCC CGTTCTATAT CATCATTGAG<br>TTCATGACCT ACGGGAACCT CCTGGACTAC CTGAGGGAGT<br>GCAACCGGCA GGAGGTGAAC GCCGTGGTGC TGCTGTACAT<br>GGCCACTCAG ATCTCGTCAG CCATGGAGTA CCTGGAGAAG                       |

---

AAAAACTTCA TCCACAG

---

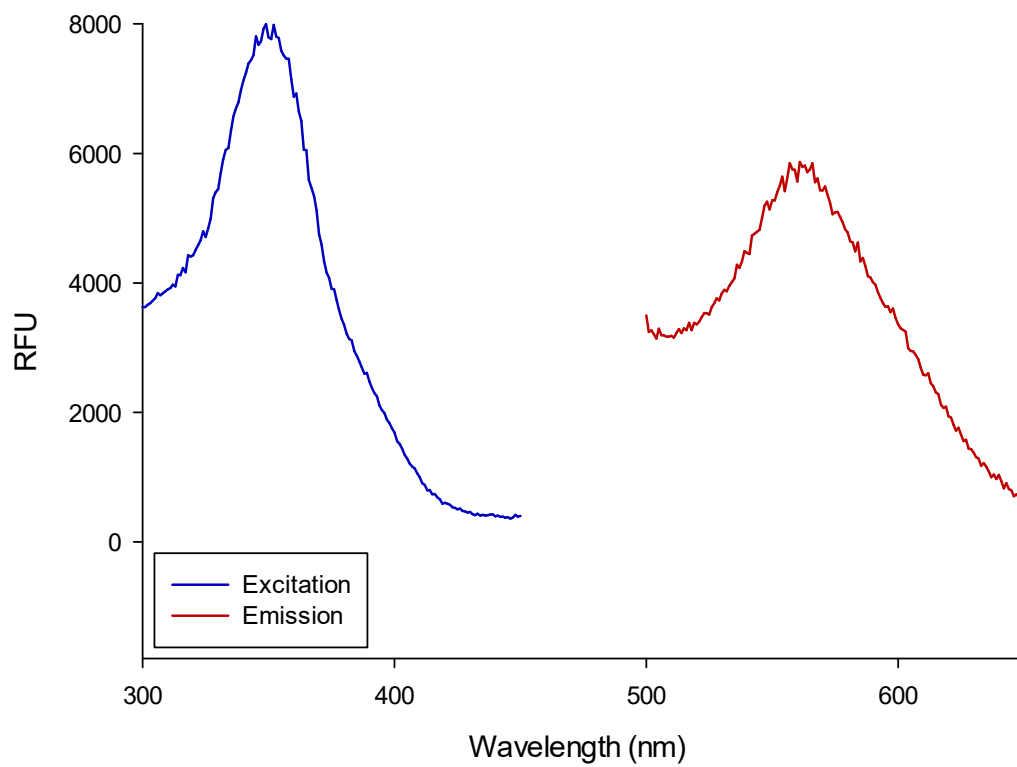

Fig. S1. Fluorescence excitation and emission scan of the copper nanoclusters synthesized with our PCR product.

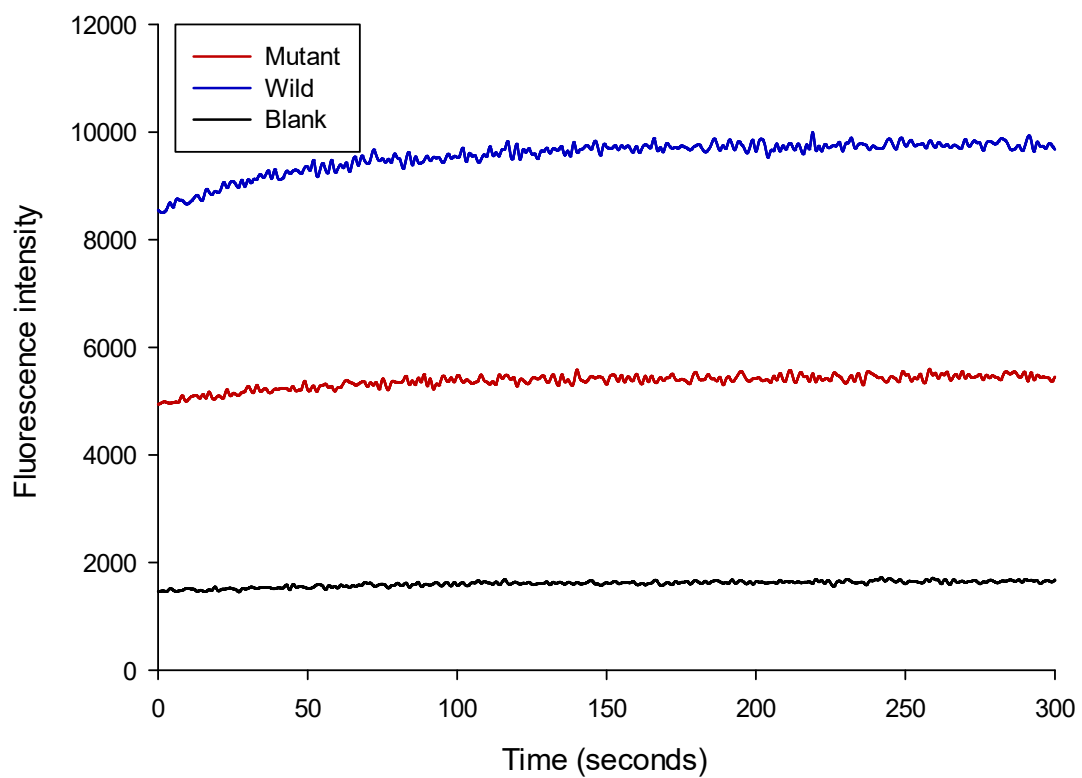

Fig. S2. Real-time fluorescence scan revealing the copper nanoclusters were synthesized and stable within 300 sec of reaction time.

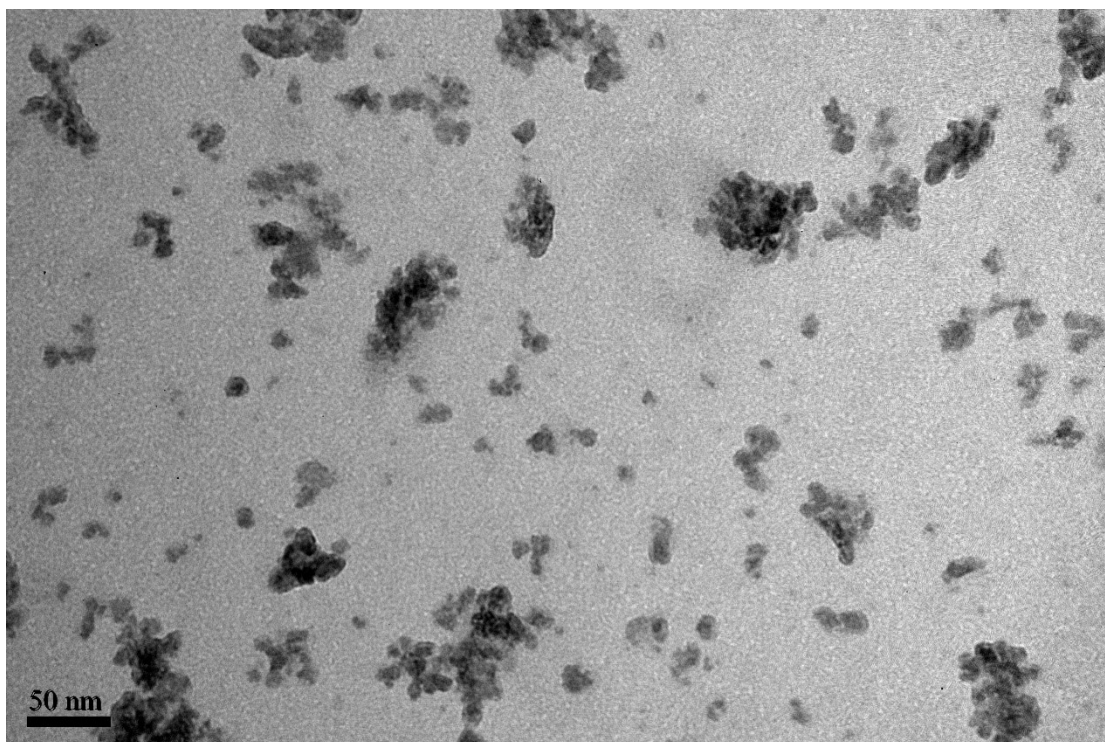

Fig. S3. The transmission electron microscope (TEM) image of the copper nanoclusters formation in our assay.

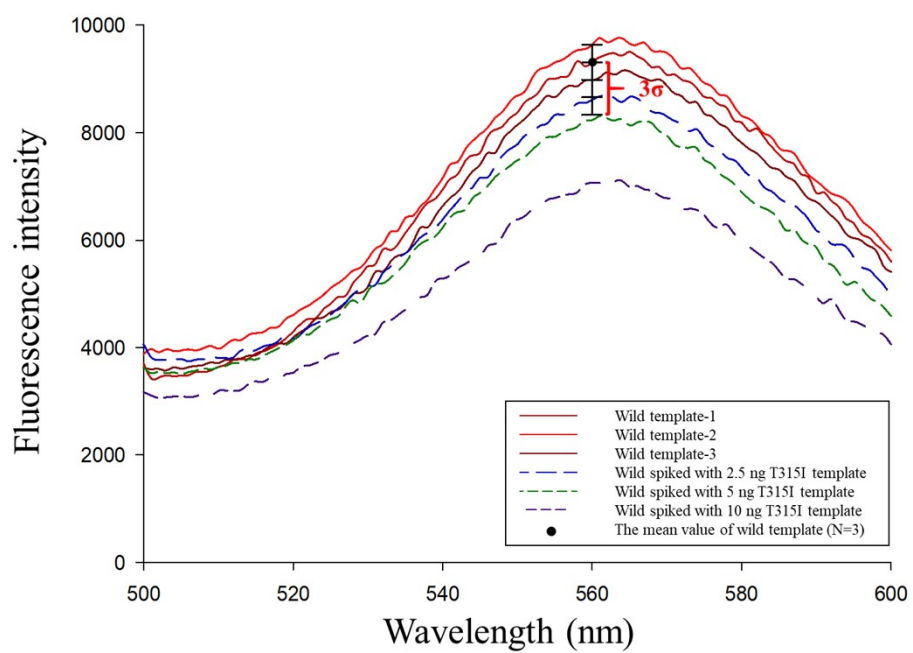

Fig. S4. The limit of the detection of the mutant type in this technique.
